# Supplementary material
Source: ML conference proceedings conference paper supplement (https://proceedings.mlr.press/v119/kumar20a.html)
Supplement: Supplementary file [file kumar20a-supp.pdf]

---

# Supplementary Material: A Sequential Self Teaching Approach for Improving Generalization in Sound Event Recognition

---

Anurag Kumar<sup>1</sup> Vamsi Krishna Ithapu<sup>1</sup>

## 1. Technical Results

$$\mathcal{L}(\mathbf{p}^s, \mathbf{y}^s) = \frac{1}{C} \sum_{c=1}^C \ell(\mathbf{p}^s, \mathbf{y}^s) \quad \text{where} \quad (1)$$

$$\ell(p_c^s, y_c^s) = -y_c^s \log(p_c^s) - (1 - y_c^s) \log(1 - p_c^s) \quad (2)$$

$$\bar{\mathbf{y}}_t^s = \alpha_0 \mathbf{y}^s + \sum_{\bar{t}=1}^t \alpha_{\bar{t}} \hat{\mathbf{p}}_{\bar{t}-1}^s \quad \text{s.t.} \quad \sum_{\bar{t}=0}^t \alpha_{\bar{t}} = 1 \quad (3)$$

$$\bar{\mathbf{y}}_t^s = \alpha_0 \mathbf{y}^s + (1 - \alpha_0) \hat{\mathbf{p}}_{t-1}^s \quad (4)$$

$$y_c^s = \begin{cases} y_c^{*s} & \text{w.p. } \delta_c \\ 1 - y_c^{*s} & \text{else} \end{cases} \quad (5)$$

$$\bar{\mathbf{y}}_1^s = \alpha_0 \mathbf{y}^s + (1 - \alpha_0) \hat{\mathbf{p}}_0^s \quad (6)$$

$$\hat{p}_{0,c}^s = \begin{cases} y_c^{*s} & \text{w.p. } \bar{\delta}_c \\ 1 - y_c^{*s} & \text{else} \end{cases} \quad (7)$$

**Proposition 1.** Let  $\mathcal{N}^1$  be trained using  $\{\mathbf{x}^s, \bar{\mathbf{y}}^s\} \forall s$  using binary cross-entropy loss, and let  $\epsilon_c$  denote the average accuracy of  $\mathcal{N}^0$  for class  $c$ . Then, we have

$$\bar{\delta}_c = \epsilon_c \delta + (1 - \epsilon_c)(1 - \delta) \quad \forall c \quad (8)$$

and whenever  $\delta < \frac{1}{2}$ ,  $\mathcal{N}^1$  improves performance over  $\mathcal{N}^0$ . The per class performance gain is  $(1 - \epsilon_c)(1 - 2\delta)$

*Proof.* Recall the entropy loss from Eq. 1, for a given  $s$  and  $c$ . Using the definition of the new label from Eq. 6, we get the following

$$\ell(p_c^s, \bar{y}_c^s) = \alpha_0 \ell(p_c^s, y_c^s) + (1 - \alpha_0) \ell(p_c^s, \hat{p}_c^s) \quad (9)$$

---

<sup>1</sup>Facebook Reality Labs, Redmond, USA. Correspondence to: Anurag Kumar <anuragkr@fb.com>.

Now, Eq. 5 says that w.p.  $\delta$  (recall  $\delta_c = \delta \forall c$  here),  $\ell(p_c^s, y_c^s) = \ell(p_c^s, y_c^{*s})$ , else  $\ell(p_c^s, y_c^s) = \ell(p_c^s, 1 - y_c^{*s})$ . Hence, using Eq. 5 and Eq. 7, and using the resulting equations in Eq. 9 we have the following

$$\mathbb{E}_s \ell(p_c^s, y_c^s) = \delta \sum_{s=1}^S \ell(p_c^s, y_c^{*s}) + (1 - \delta) \sum_{s=1}^S \ell(p_c^s, 1 - y_c^{*s})$$

$$\mathbb{E}_s \ell(p_c^s, \hat{p}_c^s) = \bar{\delta}_c \sum_{s=1}^S \ell(p_c^s, y_c^{*s}) + (1 - \bar{\delta}_c) \sum_{s=1}^S \ell(p_c^s, 1 - y_c^{*s})$$

$$\mathbb{E}_s \ell(p_c^s, \bar{y}_c^s) = (\alpha_0 \delta + (1 - \alpha_0) \bar{\delta}_c) \sum_{s=1}^S \ell(p_c^s, y_c^{*s})$$

$$+ (\alpha_0(1 - \delta) + (1 - \alpha_0)(1 - \bar{\delta}_c)) \sum_{s=1}^S \ell(p_c^s, 1 - y_c^{*s})$$

If  $(\alpha_0 \delta + (1 - \alpha_0) \bar{\delta}_c) > \delta$  then we can ensure that using  $\bar{y}_c^s$  as targets is better than using  $y_c^s$ . Now given the accuracy of  $\mathcal{N}^0$  denoted by  $\epsilon_c \forall c$ , combining Eq. 5 and Eq. 7, we can see that  $\bar{\delta}_c = \epsilon_c \delta + (1 - \epsilon_c)(1 - \delta)$ . Using this, for  $\mathcal{N}^1$  to be better than  $\mathcal{N}^0$ , we need

$$\alpha_0 \delta + (1 - \alpha_0)(\epsilon_c \delta + (1 - \epsilon_c)(1 - \delta)) > \delta \quad (10)$$

which requires  $\delta < \frac{1}{2}$ . And the gain is simply  $\alpha_0 \delta + (1 - \alpha_0) \bar{\delta}_c - \delta$  which reduces to  $(1 - \epsilon_c)(1 - 2\delta)$ .  $\square$

**Corollary 1.** Let  $\epsilon_c^t$  denote the accuracy of  $\mathcal{N}^t$  for class  $c$ . Given some  $\delta$ , there exists an optimal  $\bar{T}^c$  such that  $\epsilon_c^{\bar{T}^c} \geq \epsilon_c^t$ .

*Proof.* When  $\delta > \frac{1}{2}$ , Eq. 10 will not hold, and Proposition 1 says that  $\mathcal{N}^1$  is worse than  $\mathcal{N}^0$ . Hence  $\bar{T}^c = 1$ . On the other hand, if  $\delta < \frac{1}{2}$ , then  $\bar{\delta}_c > \delta$ , and the performance improves. For the given  $c$ , one can repeat the analysis for next stages with different values of  $\bar{\delta}_c$ .  $\bar{T}^c$  is the stage  $t$  where the corresponding  $\bar{\delta}_c$  increases over  $\frac{1}{2}$ .  $\square$

## 2. WEANET<sup>L</sup> for FSDKaggle-2019

Table 1 shows the *WEANET* architecture used for experiments on FSDKaggle-2019 dataset. *WEANET<sup>L</sup>* is just a lighter version of the one shown in Table 1 in the main paper. To keep things simple, we also use a simpler parameter-free

| Stage    | Layers                                         | Output Size                |
|----------|------------------------------------------------|----------------------------|
| Input    | Unless specified – (S)tride = 1, (P)adding = 1 | $1 \times 1024 \times 64$  |
| Block B1 | Conv: 64, $3 \times 3$                         | $64 \times 1024 \times 64$ |
|          | Conv: 64, $3 \times 3$                         | $64 \times 1024 \times 64$ |
|          | Pool: $4 \times 4$ (S:4)                       | $64 \times 256 \times 16$  |
| Block B2 | Conv: 128, $3 \times 3$                        | $128 \times 256 \times 16$ |
|          | Conv: 128, $3 \times 3$                        | $128 \times 256 \times 16$ |
|          | Pool: $2 \times 2$ (S:2)                       | $128 \times 128 \times 8$  |
| Block B3 | Conv: 256, $3 \times 3$                        | $256 \times 128 \times 8$  |
|          | Conv: 256, $3 \times 3$                        | $256 \times 128 \times 8$  |
|          | Pool: $2 \times 2$ (S:2)                       | $256 \times 64 \times 4$   |
| Block B4 | Conv: 256, $3 \times 3$                        | $256 \times 64 \times 4$   |
|          | Conv: 256, $3 \times 3$                        | $256 \times 64 \times 4$   |
|          | Pool: $2 \times 2$ (S:2)                       | $256 \times 32 \times 2$   |
| Block B5 | Conv: 512, $3 \times 2$ (P:0)                  | $512 \times 30 \times 1$   |
| Block B6 | Conv: C, $1 \times 1$                          | $C \times 30 \times 1$     |
| $g()$    | Global Average Pooling                         | $C \times 1$               |

Table 1. Model architecture for  $WEANET^L$  for FSDKaggle-2019 dataset: All convolutional layers (except B6) are followed by batch norm and ReLU; B6 is followed by sigmoid activation.

mapping function  $g()$ . We use global average pooling as  $g()$ , which takes an average of segment level outputs to produce recording level output.

### 3. Class-wise performance for Audioset

**Figure 1** shows class-wise performance for different sound classes and the improvement obtained from the sequential self-teaching approach. The blue bar shows performance obtained from base-model (a.k.a default teacher  $\mathcal{N}^0$ ). The green or red bar shows the change in performance from SUSTAIN model (corresponding to  $\mathcal{N}^4$ ) in Table 4 from main text. The classes have been sorted by change in performance, with maximum improvement for first bar in top plot and maximum reduction in *Vibraphone* class in right most bar of bottommost plot.

We see that classes such as *Zing*, *Moo*, *Cattle*, *Owl*, *Yodeling* (first 5 bars in topmost plot), get an absolute improvement of up to 0.16 to 0.19 in MAP, leading to 40 – 60% improvement in relative sense. As mentioned in the main text, there are few classes such as *Mouse*, *Squeal*, *Rattle* for which performance improves by more than 100%. Overall, *Bagpipes* sounds are easiest to recognize and we achieve an AP of 0.931 for it. *Squish* on the other hand is hardest to recognize with an AP of 0.02.

## Sequential Self Teaching for Learning Sounds

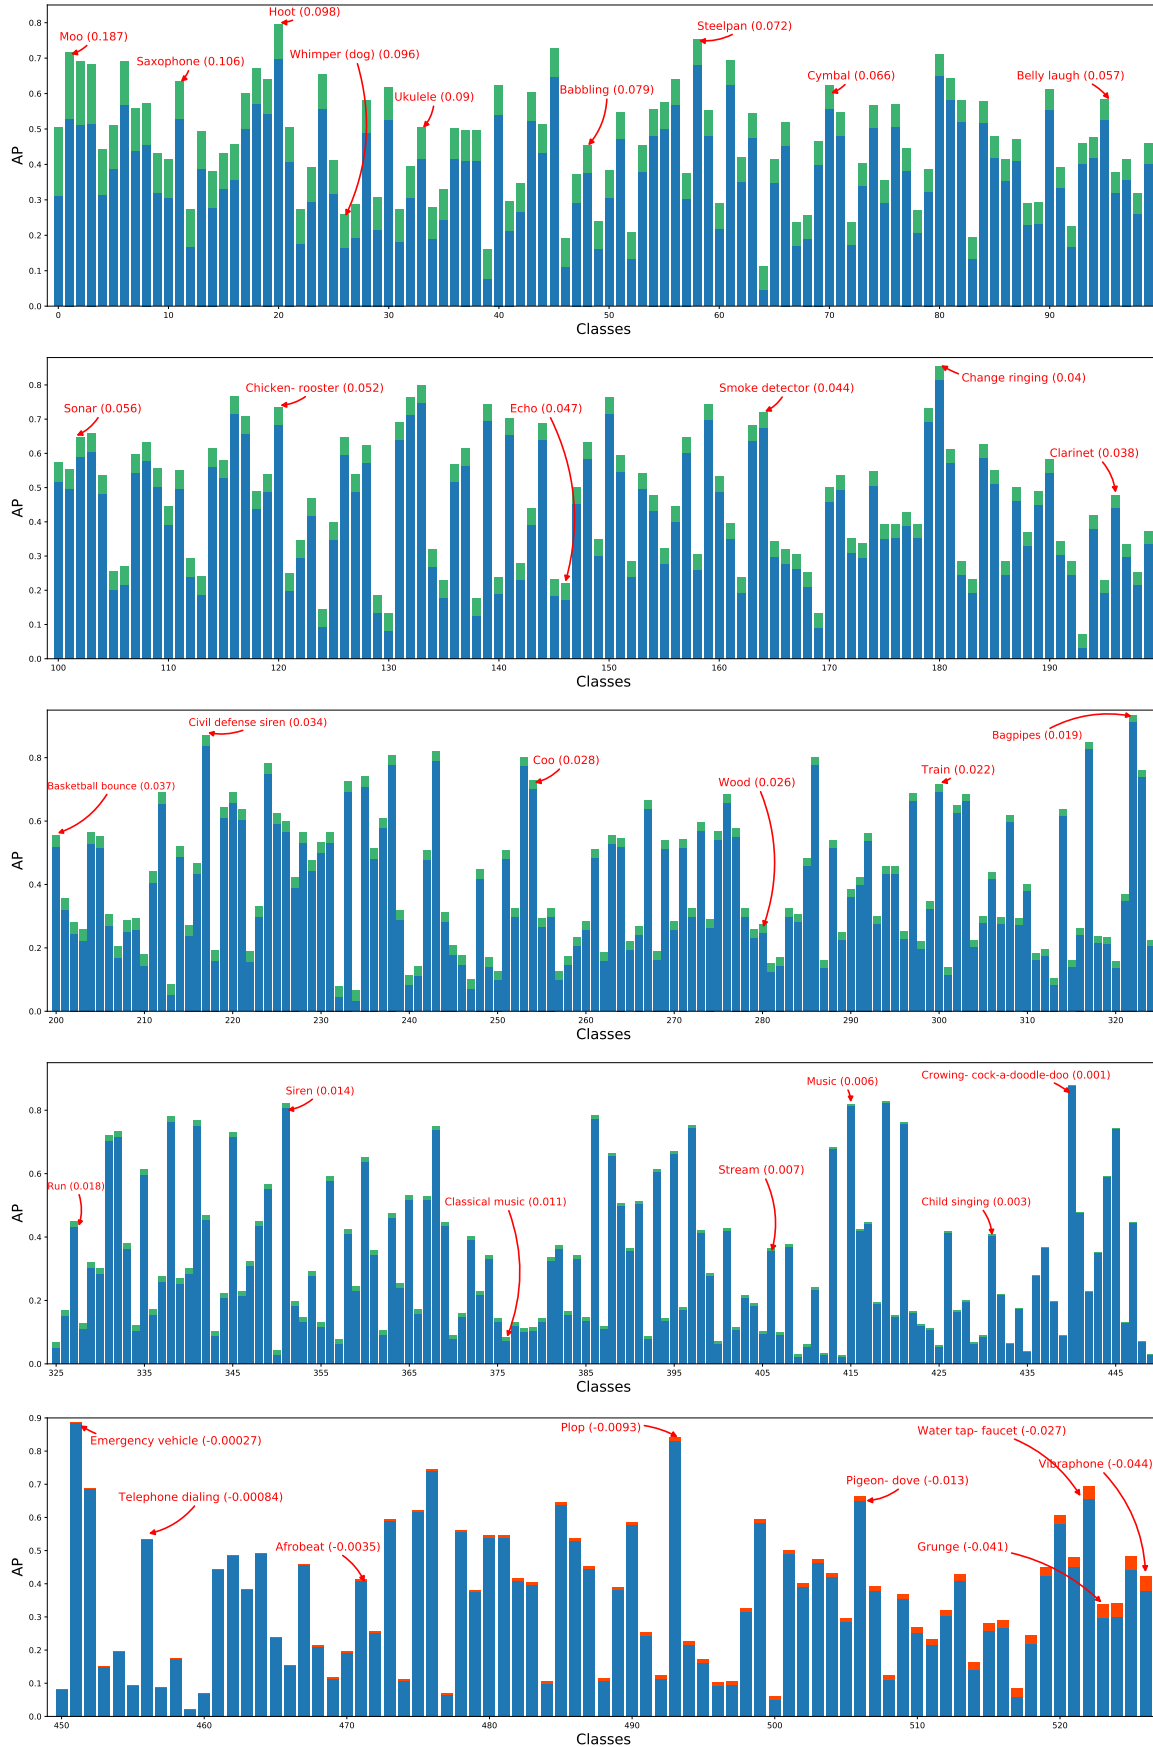

Figure 1. Audioset Class-wise AP and improvement in AP from SUSTAIN. The blue bar shows performance of  $\mathcal{N}^0$ , i.e. model trained only on available labels. The bar on top of each blue bar shows improvement (green) or deterioration (red) in performance from sequential teaching. Several classes (along with **absolute change** in performance) have been annotated to bring out noteworthy observations.
